# Supplementary material for: Synthesis and characterisation of highly branched polyisoprene: exploiting the “Strathclyde route” in anionic polymerisation
Source: Royal Society of Chemistry journal article supplement (doi:10.1039/c8ra00884a), 2018-01-01
Supplement: c8ra00884a1.pdf [file c8ra00884a1.pdf]

## Electronic Supporting Information (ESI)

### Synthesis and characterization of highly branched polyisoprene: Exploiting the “Strathclyde route” in anionic polymerization

Shehu Habibu,<sup>a,b</sup> Norazilawati Muhamad Sarihat<sup>†</sup> and Azizah Mainal<sup>a</sup>

<sup>a</sup> Polymer Research Laboratory, Department of Chemistry, Faculty of Science, University of Malaya, 50603 Kuala Lumpur, Malaysia.

<sup>b</sup> Department of Chemistry, Faculty of Science, Federal University Dutse, PMB 7651, Jigawa State Nigeria.

<sup>†</sup> corresponding author Email: nmsarihat@um.edu.my

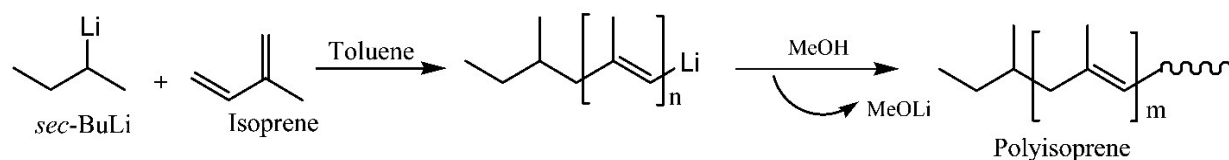

Scheme S1: Synthetic route of homopolymer polyisoprene

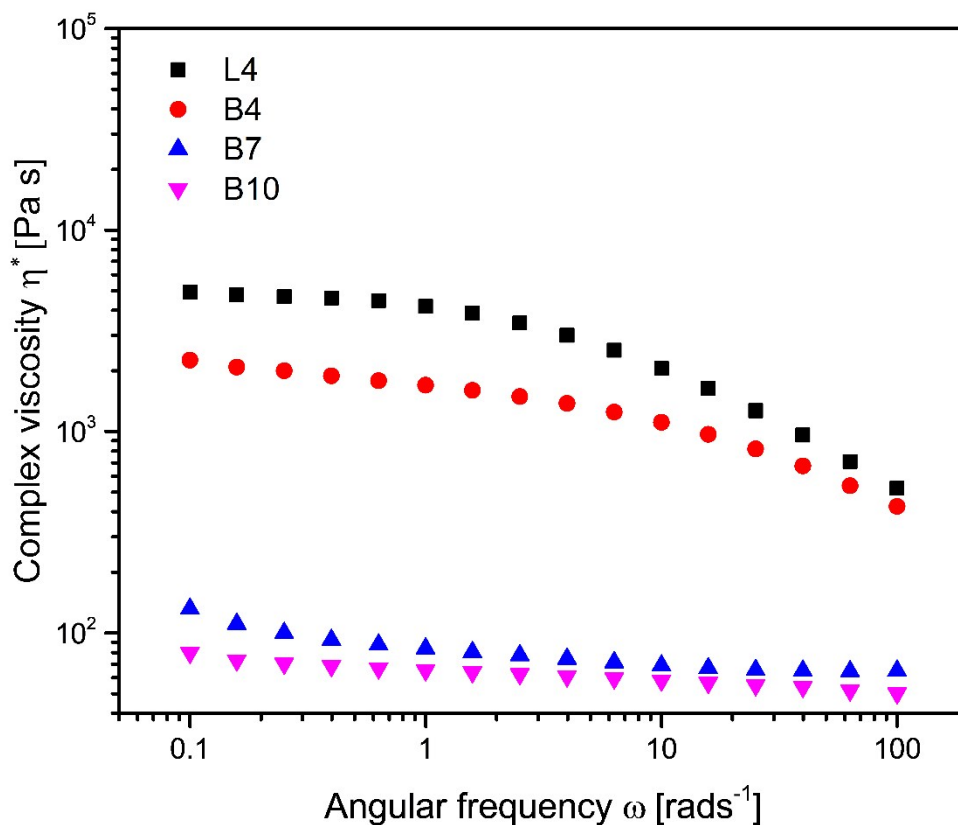

Fig. S1: Complex viscosity ( $\eta^*$ ) for the linear, L4 and branched, B4, B7 and B10 polymers at 70 °C

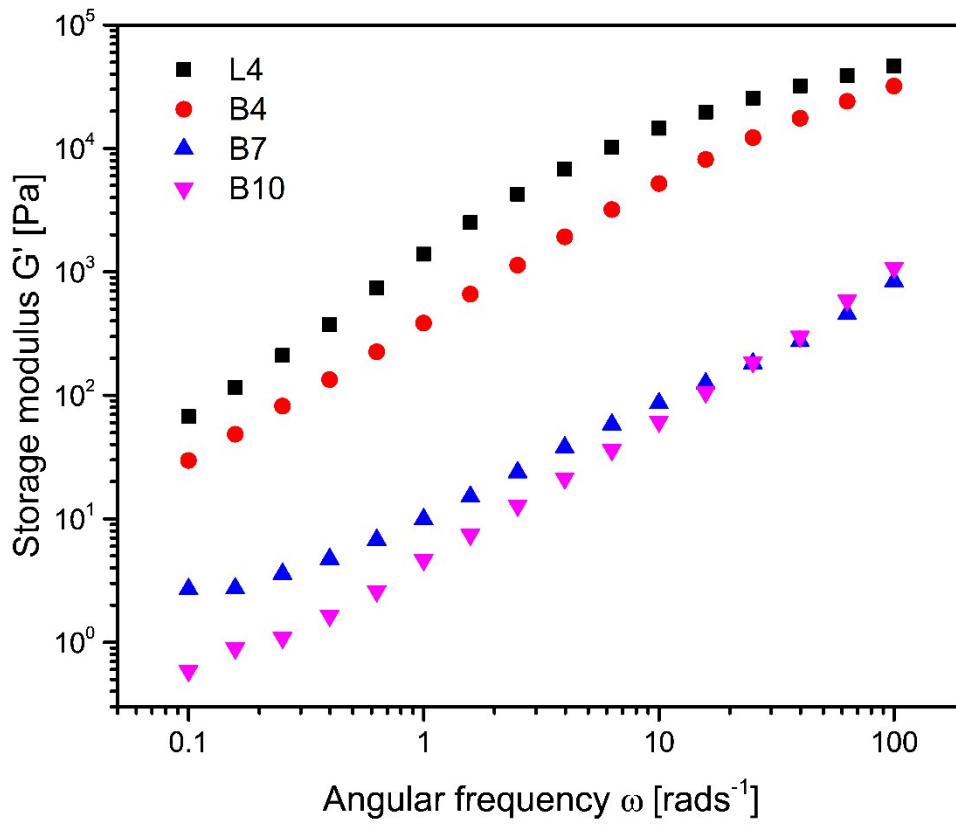

Fig. S2: Storage modulus  $G'$ , for the linear, L4 and branched, B4, B7 and B10 polymers at 70 °C

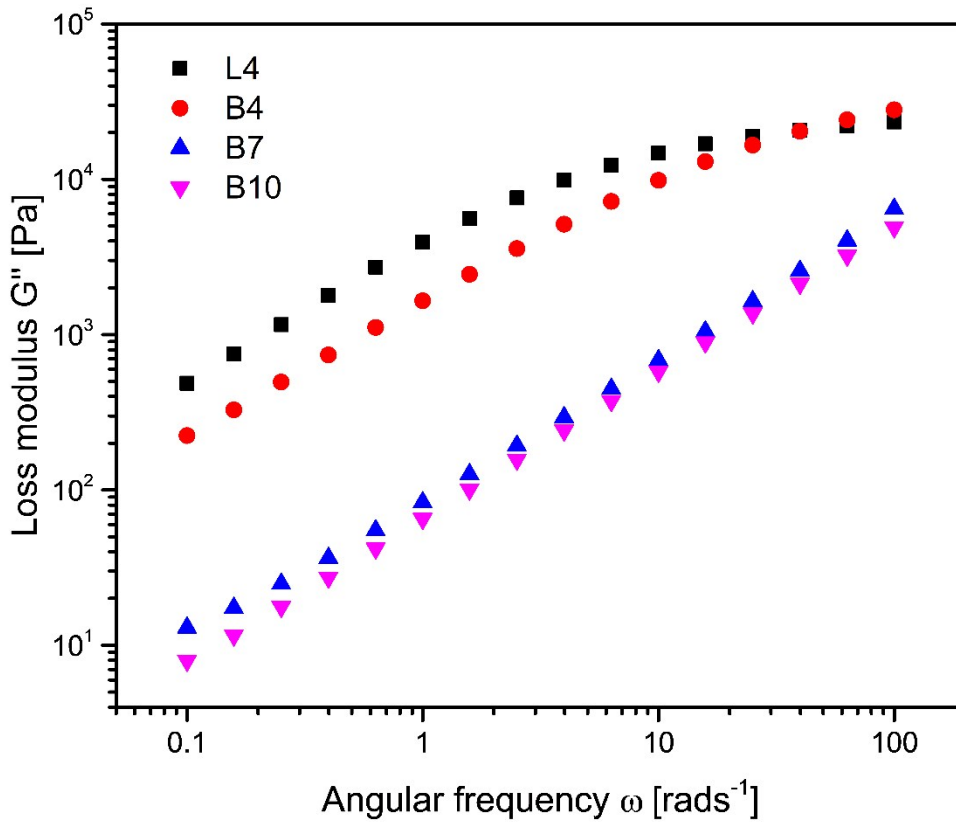

Fig. S3: Loss modulus ( $G''$ ), for the linear, L4 and branched, B4, B7 and B10 polymers at 70 °C

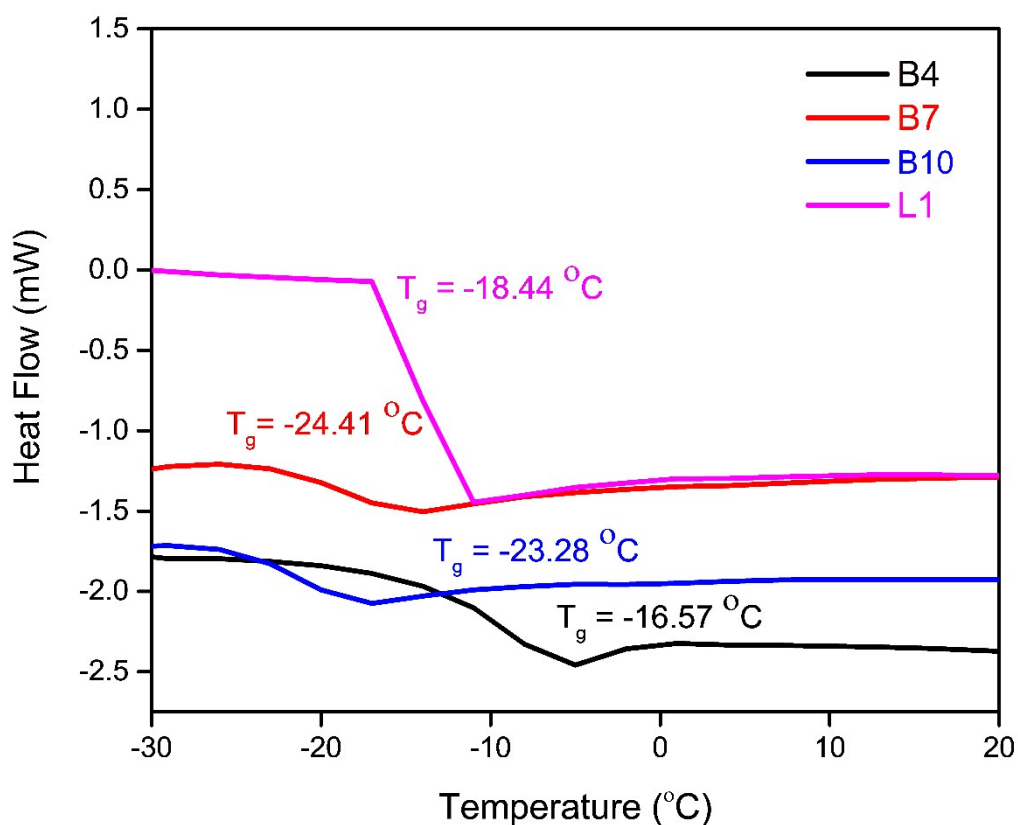

Fig. S4: DSC thermograms, for (a) linear, L1 and (b) branched, B4, B7 and B10 polymers at 70 °C

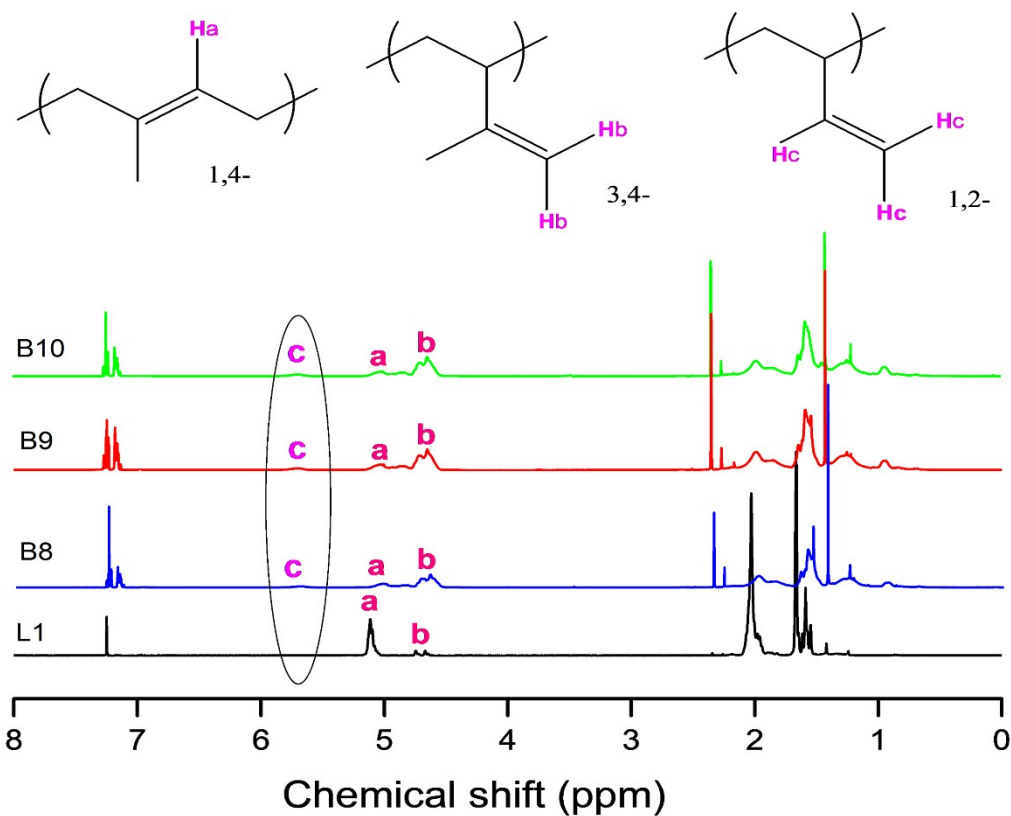

Fig. S5:  $^1\text{H}$  NMR spectra for linear (L1, TMEDA/Li = 0) and branched (B8, TMEDA/Li = 0.5; B9 TMEDA/Li = 1.0; B10, TMEDA/Li = 1.5) polymers
